# Supplementary material for: Physical Activity after Colorectal Cancer Diagnosis and Mortality in a Nationwide Retrospective Cohort Study
Source: MDPI journal article supplement (doi:10.3390/cancers13194804), 2021-09-25
Supplement: s1 [file s1]

**Table S1.** Weekly Frequency of Moderate-to-Vigorous Post-diagnosis Physical Activity and All-Cause/Colorectal Cancer/Cardiovascular Mortality in Colon and Rectal Cancer Patients.

| Treatment                                     | PA  | n       | Person-years | All-Cause |         |              | Colorectal Cancer |         |              | Cardiovascular |         |               |
|-----------------------------------------------|-----|---------|--------------|-----------|---------|--------------|-------------------|---------|--------------|----------------|---------|---------------|
|                                               |     |         |              | Events    | HR      | (95% CI)     | Events            | HR      | (95% CI)     | Events         | HR      | (95% CI)      |
| Colon cancer                                  |     |         |              |           |         |              |                   |         |              |                |         |               |
| Total                                         |     | 27,152  | 66,479.30    | 1674      |         |              | 1156              |         |              | 51             |         |               |
|                                               | 0–  | 216,411 | 39,649.36    | 1127      | 1 (Ref) |              | 757               | 1 (Ref) |              | 40             | 1 (Ref) |               |
|                                               | 3+  | 10,741  | 26,829.94    | 547       | 0.84    | (0.75, 0.93) | 399               | 0.86    | (0.76, 0.98) | 11             | 0.67    | (0.33, 1.34)  |
| Surgery only                                  |     | 20,235  | 51,621.64    | 754       |         |              | 380               |         |              | 44             |         |               |
|                                               | 0–  | 212,353 | 31,043.92    | 539       | 1 (Ref) |              | 269               | 1 (Ref) |              | 35             | 1 (Ref) |               |
|                                               | 3+  | 7882    | 20,577.71    | 215       | 0.84    | (0.71, 0.99) | 111               | 0.86    | (0.68, 1.09) | 9              | 0.65    | (0.31, 1.40)  |
| Surgery with chemotherapy and/or radiotherapy |     | 6726    | 14,507.77    | 842       |         |              | 704               |         |              | 7              |         |               |
|                                               | 0–  | 3935    | 8392.96      | 536       | 1 (Ref) |              | 439               | 1 (Ref) |              | 5              | 1 (Ref) |               |
|                                               | 3+  | 2791    | 6114.81      | 306       | 0.82    | (0.71, 0.95) | 265               | 0.85    | (0.72, 1.00) | 2              | 0.70    | (0.13, 3.86)  |
| Chemotherapy with or without radiotherapy     |     | 191     | 349.90       | 78        |         |              | 72                |         |              | 0              |         |               |
|                                               | 0–  | 123     | 212.48       | 52        | 1 (Ref) |              | 49                | 1 (Ref) |              | 0              |         |               |
|                                               | 3+  | 68      | 137.42       | 26        | 0.93    | (0.56, 1.54) | 23                | 0.84    | (0.50, 1.44) | 0              |         |               |
| Rectal cancer                                 |     |         |              |           |         |              |                   |         |              |                |         |               |
| Total                                         |     | 16,464  | 40,499.64    | 973       |         |              | 687               |         |              | 27             |         |               |
|                                               | 0–  | 210,071 | 24,308.42    | 682       | 1 (Ref) |              | 472               | 1 (Ref) |              | 17             | 1 (Ref) |               |
|                                               | 3+  | 6393    | 16,191.23    | 291       | 0.75    | (0.65, 0.87) | 215               | 0.75    | (0.64, 0.89) | 10             | 1.24    | (0.54, 2.84)  |
| Surgery only                                  |     | 9998    | 26,027.91    | 320       |         |              | 149               |         |              | 19             |         |               |
|                                               | 0–  | 6141    | 15,651.52    | 242       | 1 (Ref) |              | 113               | 1 (Ref) |              | 13             | 1 (Ref) |               |
|                                               | 3 + | 3857    | 10,376.39    | 78        | 0.72    | (0.55, 0.94) | 36                | 0.74    | (0.50, 1.10) | 6              | 0.90    | (0.32, 2.53)  |
| Surgery with chemotherapy and/or radiotherapy |     | 5972    | 13,677.37    | 552       |         |              | 447               |         |              | 8              |         |               |
|                                               | 0–  | 3630    | 8211.80      | 377       | 1 (Ref) |              | 302               | 1 (Ref) |              | 4              | 1 (Ref) |               |
|                                               | 3+  | 2342    | 5465.57      | 175       | 0.76    | (0.63, 0.91) | 145               | 0.75    | (0.61, 0.92) | 4              | 2.57    | (0.59, 11.19) |
| Chemotherapy with or without radiotherapy     |     | 494     | 794.36       | 101       |         |              | 91                |         |              | 0              |         |               |
|                                               | 0–  | 300     | 445.10       | 63        | 1 (Ref) |              | 57                | 1 (Ref) |              | 0              |         |               |
|                                               | 3+  | 194     | 349.26       | 38        | 0.87    | (0.55, 1.37) | 34                | 0.83    | (0.51, 1.34) | 0              |         |               |

Analysis with frequency of moderate-to-vigorous physical activity. Fully Adjusted for age at diagnosis, sex, BMI, smoking, alcohol consumption, insurance premium, Charlson comorbidity index, pre-diagnosis physical activity. For the total patients, treatment options were also adjusted. PA, physical activity; *n*, number of patients; HR, hazard ratio; 95% CI, 95% confidence interval; Ref, reference.

**Table S2.** Pre-diagnosis Physical Activity and All-Cause/Colorectal Cancer/Cardiovascular Mortality in Colon and Rectal Cancer Patients.

| Treatment                                     | PA                | n      | Person-years | All-Cause |                   |          | Colorectal Cancer |                   |          | Cardiovascular |                   |          |
|-----------------------------------------------|-------------------|--------|--------------|-----------|-------------------|----------|-------------------|-------------------|----------|----------------|-------------------|----------|
|                                               |                   |        |              | Events    | HR                | (95% CI) | Events            | HR                | (95% CI) | Events         | HR                | (95% CI) |
| Colon cancer                                  |                   |        |              |           |                   |          |                   |                   |          |                |                   |          |
| Total                                         |                   | 27,143 | 66,458.54    | 1673      |                   |          | 1155              |                   |          | 51             |                   |          |
|                                               | low <sup>a</sup>  | 12,755 | 31,036.73    | 791       | 1 (Ref)           |          | 548               | 1 (Ref)           |          | 29             | 1 (Ref)           |          |
|                                               | high <sup>b</sup> | 14,388 | 35,421.80    | 882       | 0.86 (0.77, 0.95) |          | 607               | 0.87 (0.77, 0.98) |          | 22             | 0.49 (0.27, 0.87) |          |
| Surgery only                                  |                   | 20,231 | 51,613.34    | 754       |                   |          | 380               |                   |          | 44             |                   |          |
|                                               | low               | 9546   | 24,127.51    | 364       | 1 (Ref)           |          | 188               | 1 (Ref)           |          | 23             | 1 (Ref)           |          |
|                                               | high              | 10,685 | 27,485.83    | 390       | 0.77 (0.66, 0.90) |          | 192               | 0.75 (0.61, 0.93) |          | 21             | 0.60 (0.32, 1.12) |          |
| Surgery with chemotherapy and/or radiotherapy |                   | 6721   | 14,495.30    | 841       |                   |          | 703               |                   |          | 7              |                   |          |
|                                               | low               | 3114   | 6747.56      | 392       | 1 (Ref)           |          | 328               | 1 (Ref)           |          | 6              | 1 (Ref)           |          |
|                                               | high              | 3607   | 7747.74      | 449       | 0.94 (0.82, 1.09) |          | 375               | 0.96 (0.82, 1.12) |          | 1              | 0.09 (0.01, 0.78) |          |
| Chemotherapy with or without radiotherapy     |                   | 191    | 349.90       | 78        |                   |          | 72                |                   |          | 0              |                   |          |
|                                               | low               | 95     | 161.67       | 35        | 1 (Ref)           |          | 32                | 1 (Ref)           |          | 0              |                   |          |
|                                               | high              | 96     | 188.23       | 43        | 0.93 (0.57, 1.52) |          | 40                | 0.88 (0.53, 1.48) |          | 0              |                   |          |
| Rectal cancer                                 |                   |        |              |           |                   |          |                   |                   |          |                |                   |          |
| Total                                         |                   | 16,453 | 40,468.54    | 971       |                   |          | 686               |                   |          | 27             |                   |          |
|                                               | low               | 8049   | 19,735.77    | 495       | 1 (Ref)           |          | 347               | 1 (Ref)           |          | 11             | 1 (Ref)           |          |
|                                               | high              | 8404   | 20,732.77    | 476       | 0.86 (0.75, 0.98) |          | 339               | 0.92 (0.79, 1.07) |          | 16             | 1.17 (0.53, 2.57) |          |
| Surgery only                                  |                   | 9993   | 26,008.18    | 318       |                   |          | 148               |                   |          | 19             |                   |          |
|                                               | low               | 4828   | 12,547.87    | 156       | 1 (Ref)           |          | 70                | 1 (Ref)           |          | 7              | 1 (Ref)           |          |
|                                               | high              | 5165   | 13,460.31    | 162       | 0.82 (0.65, 1.03) |          | 78                | 0.97 (0.69, 1.35) |          | 12             | 1.30 (0.50, 3.40) |          |
| Surgery with chemotherapy and/or radiotherapy |                   | 5966   | 13,666.00    | 552       |                   |          | 447               |                   |          | 8              |                   |          |
|                                               | low               | 2992   | 6824.21      | 287       | 1 (Ref)           |          | 229               | 1 (Ref)           |          | 4              | 1 (Ref)           |          |
|                                               | high              | 2974   | 6841.79      | 265       | 0.87 (0.73, 1.04) |          | 218               | 0.92 (0.76, 1.12) |          | 4              | 0.84 (0.20, 3.57) |          |
| Chemotherapy with or without radiotherapy     |                   | 494    | 794.36       | 101       |                   |          | 91                |                   |          | 0              |                   |          |
|                                               | low               | 229    | 363.70       | 52        | 1 (Ref)           |          | 48                | 1 (Ref)           |          | 0              |                   |          |
|                                               | high              | 265    | 430.67       | 49        | 0.99 (0.64, 1.51) |          | 43                | 0.92 (0.59, 1.44) |          | 0              |                   |          |

Analysis with pre-diagnosis physical activity. <sup>a</sup> Patients with a low level of activity (the weighted sum of the frequencies for walking, moderate, and vigorous activity less than 3 times/week). <sup>b</sup> Patients with a high level of activity (the weighted sum of the frequencies for walking, moderate, and vigorous activity greater than or equal to 3 times/week).

**Table S3** Change of Physical Activity Levels before and after diagnosis and All-Cause/Colorectal Cancer/Cardiovascular Mortality in Colon and Rectal Cancer Patients.

| Treatment                                     | PA        | n      | Person-years | All-Cause |         |              | Colorectal Cancer |         |              | Cardiovascular |         |               |
|-----------------------------------------------|-----------|--------|--------------|-----------|---------|--------------|-------------------|---------|--------------|----------------|---------|---------------|
|                                               |           |        |              | Events    | HR      | (95% CI)     | Events            | HR      | (95% CI)     | Events         | HR      | (95% CI)      |
| Colon cancer                                  |           |        |              |           |         |              |                   |         |              |                |         |               |
| Total                                         |           | 27,143 | 66,458.54    | 1673      |         |              | 1155              |         |              | 51             |         |               |
|                                               | constant  | 17,065 | 41,857.62    | 984       | 1 (Ref) |              | 669               | 1 (Ref) |              | 33             | 1 (Ref) |               |
|                                               | decreased | 4159   | 10,172.22    | 316       | 1.29    | (1.14, 1.47) | 213               | 1.30    | (1.11, 1.52) | 6              | 0.66    | (0.28, 1.59)  |
|                                               | increased | 5919   | 14,428.70    | 373       | 1.18    | (1.04, 1.33) | 273               | 1.23    | (1.07, 1.42) | 12             | 1.26    | (0.65, 2.45)  |
| Surgery only                                  |           | 20,231 | 51,613.34    | 754       |         |              | 380               |         |              | 44             |         |               |
|                                               | constant  | 12,734 | 32,609.12    | 452       | 1 (Ref) |              | 228               | 1 (Ref) |              | 29             | 1 (Ref) |               |
|                                               | decreased | 3142   | 8012.62      | 145       | 1.22    | (1.01, 1.47) | 68                | 1.14    | (0.87, 1.50) | 6              | 0.74    | (0.31, 1.79)  |
|                                               | increased | 4355   | 10,991.59    | 157       | 1.17    | (0.98, 1.40) | 84                | 1.21    | (0.94, 1.56) | 9              | 1.09    | (0.52, 2.32)  |
| Surgery with chemotherapy and/or radiotherapy |           | 6721   | 14,495.30    | 841       |         |              | 703               |         |              | 7              |         |               |
|                                               | constant  | 4220   | 9048.68      | 484       | 1 (Ref) |              | 397               | 1 (Ref) |              | 4              | 1 (Ref) |               |
|                                               | decreased | 974    | 2076.94      | 153       | 1.38    | (1.15, 1.66) | 128               | 1.42    | (1.16, 1.73) | 0              |         |               |
|                                               | increased | 1527   | 3369.67      | 204       | 1.18    | (1.00, 1.40) | 178               | 1.24    | (1.04, 1.48) | 3              | 2.52    | (0.55, 11.51) |
| Chemotherapy with or without radiotherapy     |           | 191    | 349.90       | 78        |         |              | 72                |         |              | 0              |         |               |
|                                               | constant  | 111    | 199.81       | 48        | 1 (Ref) |              | 44                | 1 (Ref) |              | 0              |         |               |
|                                               | decreased | 43     | 82.67        | 18        | 0.98    | (0.55, 1.74) | 17                | 1.01    | (0.56, 1.83) | 0              |         |               |
|                                               | increased | 37     | 67.43        | 12        | 0.74    | (0.38, 1.44) | 11                | 0.76    | (0.38, 1.52) | 0              |         |               |
| Rectal cancer                                 |           |        |              |           |         |              |                   |         |              |                |         |               |
| Total                                         |           | 16,453 | 40,468.54    | 971       |         |              | 686               |         |              | 27             |         |               |
|                                               | constant  | 10,145 | 25,021.27    | 569       | 1 (Ref) |              | 389               | 1 (Ref) |              | 21             | 1 (Ref) |               |
|                                               | decreased | 2578   | 6220.89      | 185       | 1.22    | (1.03, 1.44) | 139               | 1.32    | (1.09, 1.61) | 3              | 0.52    | (0.16, 1.77)  |
|                                               | increased | 3730   | 9226.38      | 217       | 1.05    | (0.90, 1.23) | 158               | 1.09    | (0.91, 1.32) | 3              | 0.40    | (0.12, 1.33)  |
| Surgery only                                  |           | 9993   | 26,008.18    | 318       |         |              | 148               |         |              | 19             |         |               |
|                                               | constant  | 6241   | 16,237.38    | 183       | 1 (Ref) |              | 78                | 1 (Ref) |              | 15             | 1 (Ref) |               |
|                                               | decreased | 1508   | 3894.49      | 64        | 1.26    | (0.94, 1.68) | 37                | 1.73    | (1.16, 2.57) | 2              | 0.49    | (0.11, 2.19)  |
|                                               | increased | 2244   | 5876.30      | 71        | 1.15    | (0.87, 1.51) | 33                | 1.26    | (0.84, 1.89) | 2              | 0.38    | (0.09, 1.68)  |
| Surgery with chemotherapy and/or radiotherapy |           | 5966   | 13,666.00    | 552       |         |              | 447               |         |              | 8              |         |               |
|                                               | constant  | 3616   | 8299.93      | 329       | 1 (Ref) |              | 259               | 1 (Ref) |              | 6              | 1 (Ref) |               |
|                                               | decreased | 972    | 2193.53      | 99        | 1.13    | (0.90, 1.42) | 83                | 1.20    | (0.94, 1.54) | 1              | 0.58    | (0.07, 4.84)  |
|                                               | increased | 1378   | 3172.54      | 124       | 1.04    | (0.84, 1.28) | 105               | 1.10    | (0.87, 1.38) | 1              | 0.50    | (0.06, 4.16)  |
| Chemotherapy with or without radiotherapy     |           | 494    | 794.36       | 101       |         |              | 91                |         |              | 0              |         |               |
|                                               | constant  | 288    | 483.96       | 57        | 1 (Ref) |              | 52                | 1 (Ref) |              | 0              |         |               |
|                                               | decreased | 98     | 132.87       | 22        | 1.18    | (0.70, 2.00) | 19                | 1.10    | (0.63, 1.94) | 0              |         |               |
|                                               | Increased | 108    | 177.53       | 22        | 0.87    | (0.52, 1.45) | 20                | 0.86    | (0.50, 1.47) | 0              |         |               |

Analysis with change of physical activity level.
